1 **Original Manuscript**

2 **Title: Is vectorial transmission of *Trypanosoma cruzi* an efficient route to**  
3 **support high infection rates in sylvatic hosts?**

4 Juan Manuel Cordovez<sup>1,4\*</sup>, Mauricio Santos-Vega<sup>1</sup>, Diana Erazo<sup>1</sup>, Camilo Sanabria<sup>2</sup>,  
5 Lina María Rendón<sup>3</sup>, Felipe Guhl<sup>3</sup>

6

7 <sup>1</sup> Departamento de Ingeniería Biomédica, Grupo de Investigación en Biología  
8 Matemática y Computacional BIOMAC, Universidad de los Andes, Bogotá Colombia.

9 <sup>2</sup> Departamento de Matemáticas, Grupo de Investigación en Biología Matemática y  
10 Computacional BIOMAC, Universidad de los Andes, Bogotá Colombia.

11 <sup>3</sup> Departamento de Ciencias Biológicas, Centro de Investigaciones en Microbiología y  
12 Parasitología Tropical CIMPAT, Universidad de los Andes, Bogotá Colombia.

13 <sup>4</sup> Simon A. Levin Mathematical, Computational and Modeling Sciences Center,  
14 Arizona State University, Tempe, Arizona

15

16

17

18 \*Corresponding author: [jucordov@uniandes.edu.co](mailto:jucordov@uniandes.edu.co)

19

20 **Abstract**

21 Chagas disease is caused by the parasite *Trypanosoma cruzi* and it is transmitted to  
22 humans by the triatomine bug *Rhodnius prolixus*. The main insect vector in the Andean  
23 countries presents sylvatic and domestic cycles involving humans, insects and  
24 reservoirs (e.g small mammals). It is commonly assumed that vectorial transmission is  
25 the main route for parasite spread between hosts. Recent studies have reported high  
26 percentages (21-80%) of infected opossums (*Didelphis marsupialis*) in the sylvatic  
27 cycle, raising the question of whether such a high proportion of infected could be only  
28 maintained by vectorial transmission, a seemingly inefficient pathway. To address this  
29 question, we formulated a mathematical model that describes the sylvatic transmission  
30 dynamics considering vectors and hosts and parametrized with field data. Our results  
31 show that vectorial transmission it is not sufficient to explain such high percentages of  
32 infected host-mammals reported in the literature. Here we propose oral transmission  
33 as an alternate route of transmission that may increase the number of infected  
34 individuals found in field studies.

35

36

## 37 Introduction

38 The transmission of the parasite *Trypanosoma cruzi*, etiological agent of Chagas  
39 disease, involves several pathways and results in 6 million infected people in Latin  
40 America [1]. Human infections are caused by multiple routes, the main suggested  
41 mechanism is vectorial transmission that occurs when triatomine insects feed on host  
42 blood (Sylvatic mammals and human and after a short period, the vector defecates  
43 releasing large amounts of parasites in the skin close to the wound allowing the  
44 parasite to reach the bloodstream [2-4]. Vertical transmission occurs in humans from  
45 an infected mother to a child; however, the ability of the parasite to cross the placenta  
46 of sylvatic reservoirs has not been fully demonstrated yet. Oral transmission has been  
47 proved to cause more aggressive clinical symptoms in humans and to have a high  
48 mortality rate (8-35% compared to 5-10% by vectorial transmission) only two weeks  
49 post infection [5]. In sylvatic mammals, oral transmission has been reported when  
50 mammals feed on *Rhodnius prolixus* infected with *T. cruzi* were ingested [6]. Recent  
51 studies in central Brazil have demonstrated that both vertical and oral transmission are  
52 not a rare event in this biological system. In fact, a recent study in the Pantanal Region  
53 of Brazil, have demonstrated that both the vertical and oral transmission are likely to  
54 occur, depending on the encounter possibilities of the mammals and vectors [7].

55  
56 In sylvatic mammals, particularly of the family Didelphidae, it has also been suggested  
57 that spraying from anal glands could be playing an important role in the transmission  
58 of *T. cruzi*. Opossums, mainly of the species *D. marsupialis*, have been proposed not  
59 only as a reservoir but also as a *T. cruzi* vector, since the parasite can multiply  
60 extracellularly in the anal glands of the animal [8-9]. This variety of transmission  
61 mechanisms and their relative importance in human infection compared to reservoir  
62 infection, suggests that parasites have different transmission cycles in the  
63 environment, sylvatic or domestic, that can be connected or isolated depending on the  
64 feeding behaviour of insect vectors.

65  
66 When insect vectors breed and feed inside the houses, a domestic cycle is occurring,  
67 involving human and domestic mammals as reservoirs [4,10]. On the other hand, the  
68 sylvatic cycle involves triatomine bugs living in the wild feeding on sylvatic mammals  
69 such as opossums and rodents that act as reservoirs. The connection between the two  
70 cycles occurs when insects migrate from the sylvatic to the domestic habitat attracted  
71 by light sources and domestic species presence combined with the increase in the  
72 number of domestic animals like dogs [11-14]. It must be considered that the ecological

73 interactions and encounters between vectors and reservoirs depend on the faunal  
74 composition, which is directly related with the landscape structure [15].

75

76 The domestic and peri domestic cycle has been the focus of many reports [12, 16-17]  
77 and control programs [4, 18-20], probably because is the easiest one to intervene and  
78 involves humans directly. However, understanding the sylvatic cycle is crucial because  
79 it is the source of infected insects that ultimately invade the houses. Furthermore,  
80 control programs in Colombia that used pyrethroid insecticides, that succeeded in  
81 countries like Chile and Uruguay in eliminating insects from houses [21], have shown  
82 limited effectiveness in Colombia due to a strong re-infestation phenomenon that  
83 occurs weeks after the application of the insecticide [22]. In addition, vector prevention  
84 and control activities have not been very efficient in endemic areas due to the lack of  
85 knowledge about the biological characteristics of the vector populations present in  
86 each region, leading to uncertainty about the most appropriate control measures in  
87 each transmission scenario [23]. Thus, we investigate in more detail the sylvatic cycle  
88 dynamics for the Colombian endemic department of Casanare a territory of high  
89 interest involving both Chagas disease transmission cycles and high *T. cruzi* natural  
90 infection in *R. prolixus* [24-27].

91

92 In rural areas of Colombia, particularly in the Orinoco region where the Casanare  
93 department is located, *R. prolixus* is considered the main vector of *T. cruzi*  
94 transmission. Its main habitat are palm trees, particularly the species *Attalea*  
95 *butyracea*, in a landscape where houses are scarce and well spread. This palm tree  
96 species is widely distributed and establishes a large faunistic reserve, where  
97 mammalian reservoirs are typically found in the crowns [23]. In this natural habitat,  
98 where triatomines and mammals coexist and interact, the vectorial pathway of parasite  
99 transmission between them has been demonstrated by many studies [2]. Few authors  
100 had documented the existence of both oral and congenital pathways [28-29]. This  
101 raises the difficulty of knowing whether vector transmission is acting as a sole route,  
102 or if multiple transmission modes act simultaneously.

103

104 Regardless of the transmission route, the question of how severe is the infection in  
105 sylvatic reservoirs has appeared repeatedly and several studies have reported the  
106 proportion of different infected mammals. This is important because high levels of  
107 reservoirs infection suggest higher probabilities for human infection. For example, bats  
108 can play an important role in transmission scenarios, because their high mobility allows  
109 the parasite to migrate between the sylvatic and domestic habitat. Studies carried out

110 in Casanare in different bat species reported infection indexes of *T. cruzi* from 6.5% to  
111 51% [26, 30]. Moreover, *Didelphis marsupialis* has been considered one of the main  
112 reservoirs of the parasite and previous studies suggest infection rates ranging from 5  
113 to 90% [31-32]. More recent studies have reported 80% and 89% infected mammals  
114 in an area with similar ecological characteristics to the department of Casanare [33-  
115 34. Finally, the results from our studies showed an infection rate of 21% in *D.*  
116 *marsupialis*. Hypothetically if vectorial transmission is acting alone, host reservoirs will  
117 become infected only if after a blood meal the insect defecates on the skin and then  
118 the parasites find their way into the bloodstream, and insects would become infected  
119 if they suck blood from an infected mammal. This poses the question of whether  
120 vectorial transmission is sufficient to sustain more than 21% of infected hosts in a  
121 population, as reported before.

122

123 Several mathematical models of Chagas disease have been proposed in the last two  
124 decades to study its epidemiology and more recently its ecology. Among the first  
125 models we can find general analysis of vector and host dynamics [35], the  
126 incorporation of acute and chronic stages [36] or models accounting for congenital  
127 transmission [37], spatially explicit models [38], age-structure models [39], and  
128 stochastic models [40]. On the ecological side, more recent models have investigated  
129 the role of dogs [41] and synantropic animals in human infection [42], and the sylvatic  
130 cycle dynamics in different habitats varying in their host communities [43]. However,  
131 none of these models has evaluated if the assumed mechanisms of transmission could  
132 explain the sylvatic host infection that is observed in the wild.

133

134 Here we investigate if vectorial transmission per se is capable to maintain the  
135 transmission observed in the data by using a mathematical modeling approach. By  
136 exploring the model, we will address if the well-known vectorial transmission is enough  
137 to support the high infection rates among sylvatic reservoirs and, if so, to propose  
138 entomological control strategies that would be adequate to reduce the risk of infection  
139 to humans.

140

## 141 **Methods and Results**

142 We formulate different epidemiological models to recreate the sylvatic transmission  
143 cycle and establish the interactions between vectors and reservoirs. In the model, we  
144 consider hosts (*H*) and vectors (*V*) to represent the population of *D. marsupialis* and  
145 *R. prolixus* respectively, and the model was set to represent the dynamics in the region

146 of Casanare, Colombia composed by large palm plantations. The results are  
 147 normalized per palm as a study unit. The total number of hosts,  $N_H$ , is divided into  
 148 susceptible ( $S_H$ ) and infected class ( $I_H$ ). Similarly, the total population of vectors  $N_V$ , is  
 149 divided into susceptible ( $S_V$ ) and infected ( $I_V$ ). Our first model depicted in figure 1A, the  
 150 vectors become infected at a rate ( $\beta_{HV}$ ) that reflects the transmission of the parasite  
 151 from an infected host to a susceptible vector due to biting. Then the host become  
 152 infected at a rate ( $\beta_{VH,0}$ ) that reflects the transmission of the parasite from an infected  
 153 vector to a susceptible host due to biting. Likewise, ( $\beta_{VH,1}$ ) is the transmission rate by  
 154 ingestion (consumption or predation) of the infected vector by the reservoir. In this way  
 155  $\beta_{HV}$ ,  $\beta_{VH,0}$ , and  $\beta_{VH,1}$  consider triatomine – host contact rate by the probability of  
 156 infection from the one to the other. The second model, in figure 1B, considers the  
 157 same routes of transmission as the previous model and includes a new rate reflecting  
 158 the possibility of susceptible host acquiring the parasite from an infected host ( $\beta_{HH}$ ).  
 159  
 160

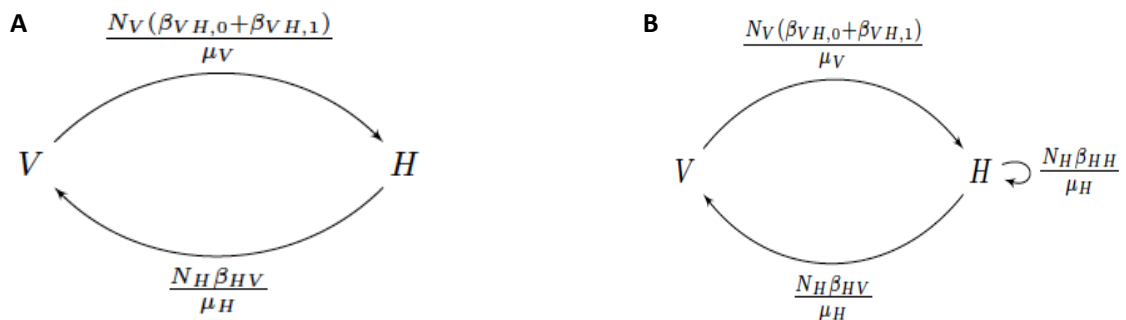

161  
 162 **Figure 1.** A) Shows the Vector-host model. Vector-host model with transmission  
 163 between hosts

164  
 165 The two models are summarized by the equations:  
 166

167 
$$\frac{dS_V}{dt} = \mu_V N_V - \beta_{HV} I_H S_V - \mu_V S_V$$

168  
 169 
$$\frac{dI_V}{dt} = \beta_{HV} I_H S_V - \mu_V I_V$$

170  
 171 
$$\frac{dS_H}{dt} = \mu_H N_H - (\beta_{VH,0} + \beta_{VH,1}) I_V S_H - \mu_H S_H$$

172

173 
$$\frac{dI_H}{dt} = \{(\beta_{VH,0} + \beta_{VH,1})I_V + \beta_{HH}I_H\}S_H - \mu_H I_H$$

174

175

176 Where the model with no transmission between hosts (Figure 1A) is obtained by  
 177 making  $\beta_{HH} = 0$ . Having no vital dynamics,  $N_V = S_V + I_V$  and  $N_H = S_H + I_H$  are  
 178 constant, the equations collapse into:

179

180 
$$\frac{dI_V}{dt} = \beta_{HV}I_H(N_V - I_V) - \mu_V I_V$$

181

182 
$$\frac{dI_H}{dt} = \{(\beta_{VH,0} + \beta_{VH,1})I_V + \beta_{HH}I_H\}(N_H - I_H) - \mu_H I_H$$

183

184 The Next Generation Matrix ( $G$ ) for this model is:

185

186 
$$G = \begin{bmatrix} 0 & \frac{N_V \beta_{HV}}{\mu_H} \\ \frac{N_H(\beta_{VH,0} + \beta_{VH,1})}{\mu_V} & \frac{N_H \beta_{HH}}{\mu_H} \end{bmatrix}$$

187

188

189 And the adjacency matrix ( $S(G)$ ) is then:

190

191 
$$S(G) = \begin{bmatrix} 0 & 1 \\ 1 & \epsilon \end{bmatrix}$$

192

193 Where  $\epsilon = 1$  or  $\epsilon = 0$ , depending whether there is transmission between hosts. The  
 194 spectral radius  $\rho$  of  $S(G)$  is either 1 if  $\epsilon = 0$ , or  $(1 + \sqrt{5})/2$  if  $\epsilon = 1$ . Now if  $\mu(G)$  is the  
 195 *critical virulence* [44] of our epidemiological system and  $R_0$  its basic reproductive  
 196 number:

197

198 
$$\mu(G) \leq R_0 \leq \rho \mu(G)$$

199

200 Therefore, with no transmission between hosts

201

202 
$$R_0 = \mu(G) = \sqrt{\frac{N_V N_H \beta_{HV} (\beta_{VH,0} + \beta_{VH,1})}{N_V \mu_H}}$$

203

204 And with it

205 
$$\mu(G) \leq R_0 \leq \frac{1 + \sqrt{5}}{2} \mu(G) \approx 1.618 \mu(G)$$

206 Where

207 
$$\mu(G) = \max \left\{ \sqrt{\frac{N_V N_H \beta_{HV} (\beta_{VH,0} + \beta_{VH,1})}{\mu_V \mu_H}}, \frac{N_H \beta_{HH}}{\mu_H} \right\}$$

208

209 In order to have an endemic equilibrium, where the parasite invaded the ecosystem, it

210 is necessary to have  $R_0 > 1$ . In the first model (Figure 1A), in this equilibrium, if it exists,

211 the number of infected hosts corresponds to:

212

213 
$$I_H^* = \frac{N_V N_H \beta_{HV} (\beta_{VH,0} + \beta_{VH,1}) - \mu_V \mu_H}{\beta_{HV} \{N_V (\beta_{VH,0} + \beta_{VH,1}) + \mu_H\}}$$

214

215 
$$I_H^* = N_H \left( 1 - \frac{1}{R_0^2} \right) \left( \frac{N_V (\beta_{VH,0} + \beta_{VH,1})}{N_V (\beta_{VH,0} + \beta_{VH,1}) + \mu_V} \right)$$

216

217 
$$I_H^* \leq N_H \left( 1 - \frac{1}{R_0^2} \right)$$

218

219

220 In the second model (Figure 1B), we know that the parasite will not invade the

221 ecosystem if

222

223 
$$\mu(G) < \frac{2}{1 + \sqrt{5}} = \frac{\sqrt{5} - 1}{2} \approx 0.618$$

224

225

226 For the numerical exploration of the model we used parameters from the literature. To

227 determine their maximum values for transmission coefficients, which are the most

228 uncertain parameters, we combined expert knowledge, field and lab measures from

229 several sources (Table I). Death rate parameters were estimated based on the average

230 of the life expectancy (1/life expectancy) from literature reports.



231

232 Finally, to relax the assumption of the transmission following the mass action law an  
 233 alternate way to model the transmission would be incorporate saturation effects in the  
 234 transmission. The most common way to include the effects of saturation in a biological  
 235 model is to consider an analogous to the Michaelis-Menten equation in the definition  
 236 of both transmission coefficients. Here, we redefined the transmission rates in our  
 237 model to include saturation in the following manner:

238 
$$\beta_{HV} = \frac{b_{HV}N_H}{a_{HV}N_H}; \beta_{VH} = \frac{b_{VH}N_V}{a_{VH}N_V}$$

239 where  $b$  is the maximum transmission coefficient and  $a$  reflects the number of hosts  
 240 necessary to reach the saturation level (when  $N_H = a$ , the transmission coefficient  
 241 takes the value of  $b/2$ ). However, even if we consider a more realistic interaction  
 242 between reservoirs and vectors the model could predicts reproductive numbers higher  
 243 than 1 for some combinations of the transmission coefficients and does not explain the  
 244 high levels of infection found in the field studies.

245

246 **Table I.** Parameters used in the mathematical model of the sylvatic cycle of Chagas  
 247 disease.

248

| <i>Terminology</i> | <i>Definition</i>                                                              | <i>Value</i>       | <i>References</i> |
|--------------------|--------------------------------------------------------------------------------|--------------------|-------------------|
| $N_V$              | Total number of vectors <sup>a</sup>                                           | 9.6/palm           | [26]              |
| $N_H$              | Total number of hosts <sup>a</sup>                                             | 1.5/100ha          | [26]              |
| $\beta_{HV}^*$     | Max transmission rate of vector by contact with infected host <sup>b</sup>     | 1                  | [55]              |
| $\beta_{VH,0}^*$   | Max transmission rate of host due to an infected vector (biting) <sup>ab</sup> | $1 \times 10^{-2}$ | [45]              |

|                  |                                                                          |                    |            |
|------------------|--------------------------------------------------------------------------|--------------------|------------|
| $\beta_{VH,1}^*$ | Transmission rate of host due to an infected vector (oral) <sup>ab</sup> | $1 \times 10^{-1}$ | [45]       |
| $\beta_{HH}^*$   | Transmission rate of host by contact with infected host <sup>b</sup>     | $1 \times 10^{-1}$ | [55]       |
| $\mu_V$          | Death rate for vectors <sup>a</sup>                                      | 1.7/year           | [46]       |
| $\mu_H$          | Death rate for host <sup>a</sup>                                         | 0.666/year         | [47,48,49] |

249 \* Transmission rates are reported to the nearest order of magnitude.

250 <sup>a</sup> Parameter was calculated using literature reports.

251 <sup>b</sup> Parameter was calculated using expert knowledge.

252

253 A sensitivity analysis for global reproductive number  $R_0$  was performed using the Latin  
 254 Hypercube method (LH) to estimate each parameter contribution. Negative Partial  
 255 Rank Correlation Coefficients (PRCC) indicate a decrease in  $R_0$  and PRCC positive  
 256 values indicate an increment in  $R_0$ . Thus, increases in  $N_V$ ,  $N_H$ ,  $\beta_{HV}$ ,  $\beta_{VH,0}$ , and  $\beta_{VH,1}$   
 257 produce a rise in  $R_0$  (Fig. 2). The positive effect (PRCC) of these parameters ranges  
 258 between 0.61 and 0.65 for the model without oral transmission and when it is included,  
 259 the contribution of vector-host transmission rates ( $\beta_{VH,0}$ ,  $\beta_{VH,1}$ ) is shared by both  
 260 parameters ( $\beta_{VH,0}$  PRCC = -0.30 and  $\beta_{VH,1}$  PRCC = -0.33). On the other hand, vector  
 261 and host death rates have significant effect on lowering  $R_0$  (model without oral  
 262 transmission  $\mu_V$ , PRCC = -0.61 and  $\mu_H$  PRCC = -0.58, including oral transmission  $\mu_V$ ,  
 263 PRCC = -0.61 and  $\mu_H$  PRCC = -0.58).

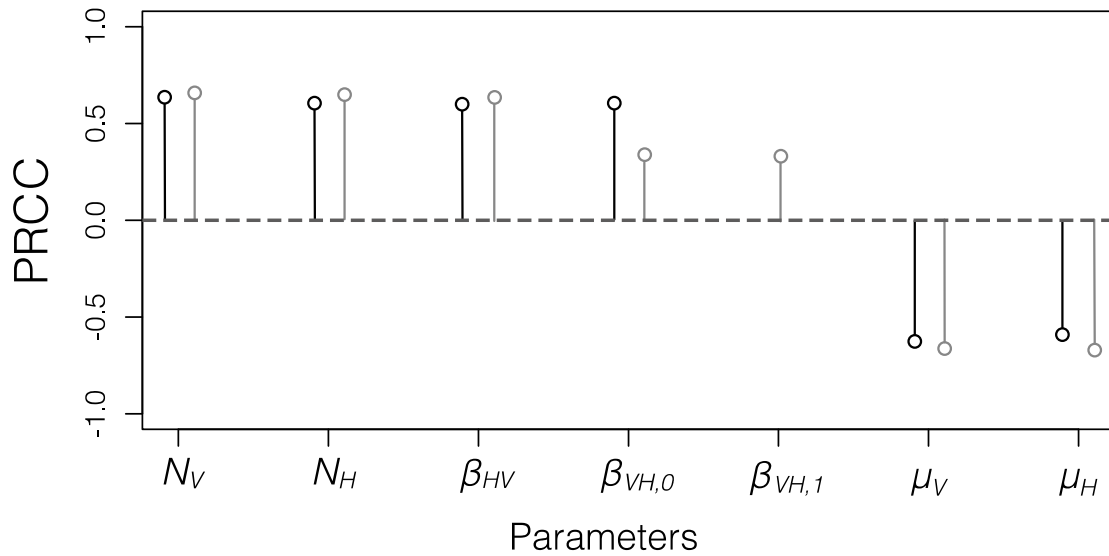

264

265 **Figure 2.** Latin Hypercube Sampling for the global reproductive number  $R_0$ . PRCC:  
266 Partial Rank Correlation Coefficient. Black colored circles correspond to the model  
267 without oral transmission and gray to the model including oral transmission. For  
268 information about each parameter's explanation see Table 1. Note that parameters  
269 related to host-vector (and vice versa) infection rates and populations ( $N_V$ ,  $N_H$ ,  $\beta_{HV}$ ,  
270  $\beta_{VH,0}$ , and  $\beta_{VH,1}$ ) have a positive contribution to  $R_0$ . On the contrary, vector and host  
271 death rates ( $\mu_V$  and  $\mu_H$ ) have a negative effect in  $R_0$ .

272

273 Plugging the parameter values into the maximum critical virulence equation  $\mu(G)$  and  
274 considering the maximum probability value in each transmission rate ( $\beta$ ) we got that  $\mu$   
275 ( $G$ ) max is between 0.3584 and 0.0224. Since none of these values are greater than  
276 0.618, an endemic infection with the parasite cannot occur, interestingly this indicates  
277 that another route of transmission, apart from the vector route, is needed to explain  
278 high percentages of host infection rates. Figure 3 show a numerical exploration of the  
279 model considering parameter ranges for  $\beta_{HV}$  and  $\beta_{VH,0}$ , here is evident that for every  
280 combination of parameters a model that just incorporates vectorial transmission is not  
281 capable to exhibit an  $R_0$  bigger than one.

282

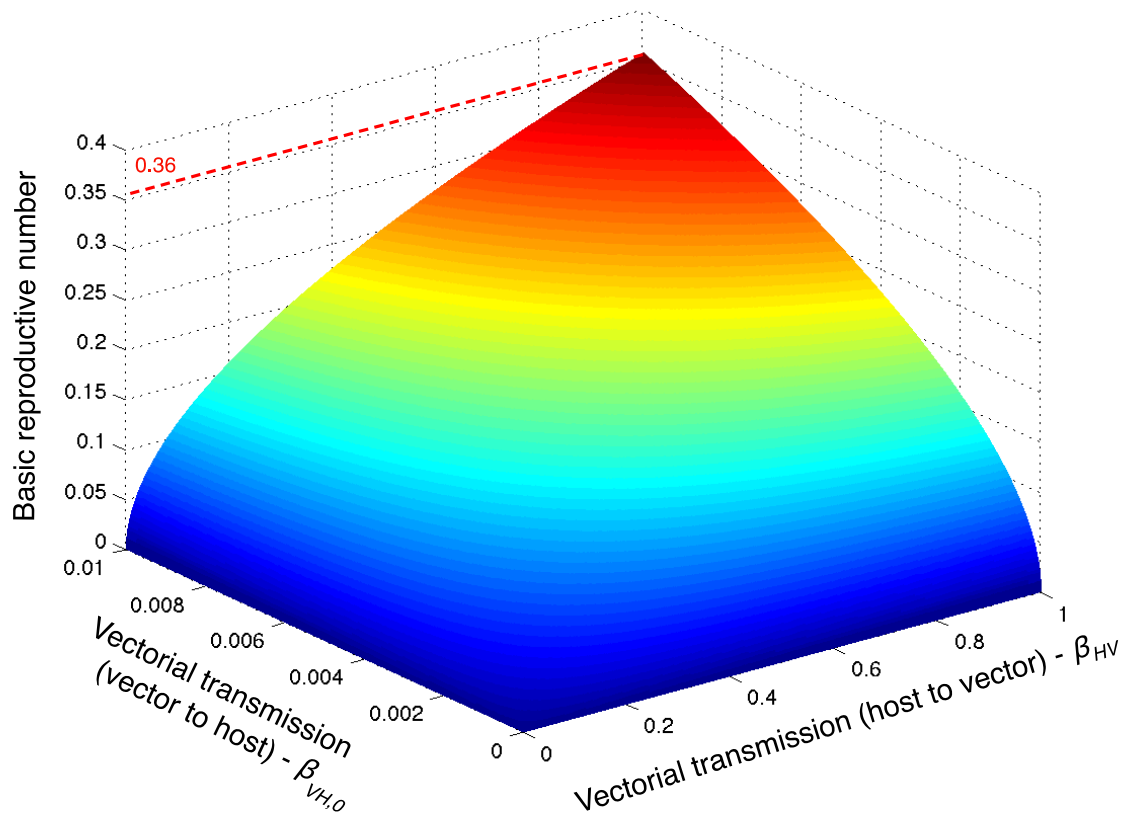

283

284

285 **Figure 3.**  $R_0$  values depicted in z depending on  $\beta_{HV}$  (here in x) and  $\beta_{VH,0}$  (here in y)  
286 we used for the analyses the palm as the study unit. In this case the max  $R_0$  is lower  
287 than 0.4.

288

289 In addition, Figure 4 shows values of  $R_0$  resulted from simulations of the model with a  
290 range of values of the oral transmission parameter  $\beta_{VH,1}$  assuming that  $\beta_{HV}$  and  $\beta_{VH,0}$   
291 are at the maximum value found in figure 2, we found that  $\beta_{VH,1}$  has to be 0.07 or bigger  
292 in order to reach and  $R_0$  above 1 (Figure 4).

293

294

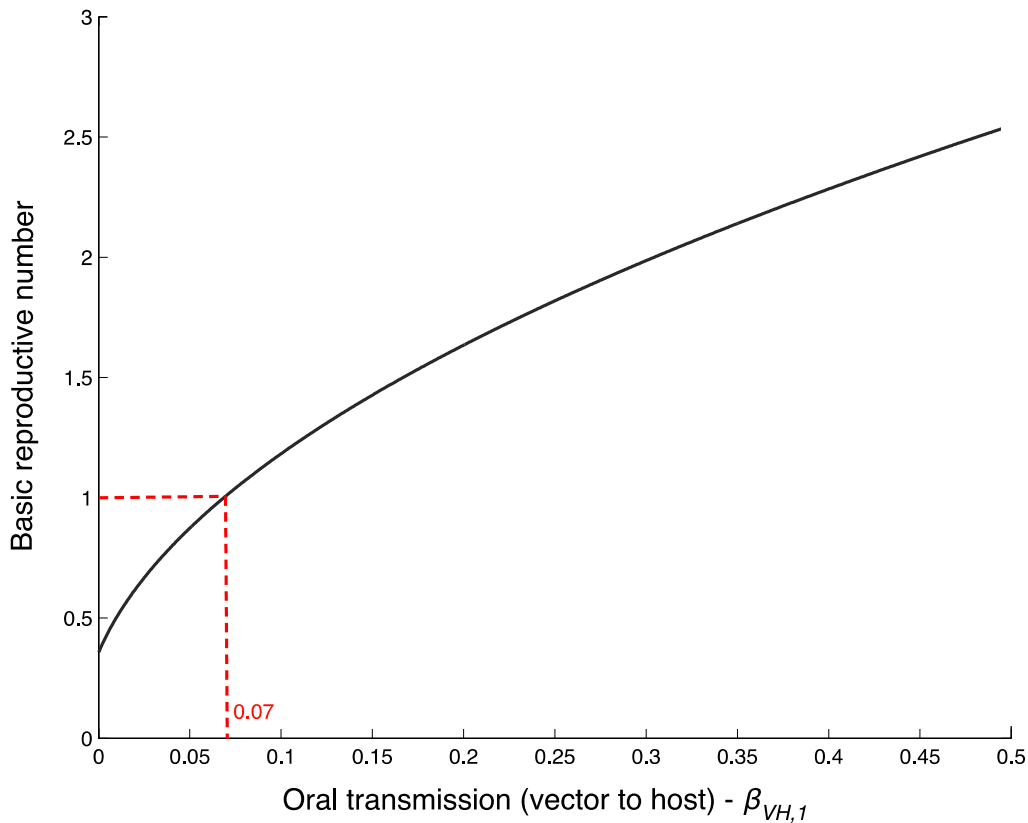

295

296 **Figure 4.** The x axis represents  $n \beta_{VH,1}$  values range and their corresponding  $R_0$ . We  
297 assume maximum values for  $\beta_{HV}$  (1) and  $\beta_{VH,0}$  (0.01). In this case,  $\beta_{VH,1}$  must be larger  
298 than 0.07, for  $R_0$  to have a value above 1.

299

### 300 Discussion

301 To the date, studies that investigate in detail the dynamics of the sylvatic cycle of *T.*  
302 *cruzi* transmission are still rare. Nonetheless, it has been shown for the endemic region  
303 of Casanare a stable sylvatic transmission, where *R. prolixus* individuals were captured  
304 in palm trees (*A. butyracea*) [25-27]. These studies have reported infections rates in  
305 mammals ranging from (21-89%) [26, 34, 50, 51]. This is remarkable fact, given that  
306 vectorial route has been considered inefficient since the parasite faces great  
307 challenges to infiltrate the host bloodstream via vectorial route [52], thus this route its  
308 unable to explain the observed reservoir prevalence reported in the literature.

309

310 *T. cruzi* vectorial transmission has been suggested to be among one the most  
311 inefficient ways for parasites to infect susceptible hosts, although the number of  
312 infected hosts it is high on the field fluctuating between 40 to 90% [31-33]. Our results  
313 from model simulations only considering vectorial transmission show that the basic

314 reproductive number  $R_0$  is always less than 1. This implies that an additional  
315 transmission route is needed to guarantee an endemic state ( $R_0 > 1$ ). Although, there  
316 are no reports in the literature for natural occurring populations where the transmission  
317 of the parasite is not supported due to low transmission rates. Perhaps for other vector  
318 populations, like *Triatoma dimidiata*, this could be the case and it would be interesting  
319 to verify it in the field.

320

321 One of our main goals with this study was to establish if vectorial transmission per se  
322 was able to explain the high-reported levels of infected hosts. Our results demonstrate  
323 that even if we simulate the system at their maximal critical virulence  $\mu(G)$  over the  
324 highest possible value combinations of transmission rates the system never reaches  
325 high number of infected hosts. The incorporation of a new route of transmission, such  
326 as the oral transmission, let the system reach the high proportion of infected hosts  
327 reported in field studies [47,52-54]. However, these high proportion of infected host  
328 could also be obtained with higher levels of transmission rates, in particular increasing  
329 the transmission rate from vectors to host  $\beta_{VH}$ , even though we believe that the high  
330 values needed are outside of the biological range we have no report to compare to and  
331 thus this is mainly speculative.

332

333 Results from our sensitivity analysis suggest there is no single variable or parameter  
334 that by itself explains the dynamics in the systems. Instead, we were able to identify a  
335 subset of factors that together help to explain the temporal variation in the system.  
336 First, in the absence of oral transmission the dynamics is explained by the transmission  
337 rate and the population size and the incorporation of the oral transmission add a  
338 significant positive effect that help to reach a higher number of infected hosts. In  
339 addition, it is important to note that the direction of change in the fraction of infected  
340 hosts after a change in the parameter is given by the sign of its condition number: a  
341 same direction change (e.g. increase parameter-increase  $i_H$ ) is a positive condition  
342 number, while an opposite direction change (e.g. increase parameter-decrease  $i_H$ )  
343 produces negative condition numbers. Using the parameter values in table 1, we found  
344 that for increasing growth rates increases the fraction of infected hosts. However, the  
345 effect of changing  $N_V$  is an order of magnitude lower than changing  $N_H$  in the same  
346 proportion (same relative change). For death rates, we have an opposite-direction  
347 effect as it was expected, meaning that if we have more vector or host, the contact  
348 between both would be lower accordingly to the mass action law, so the net flow of  
349 individuals from susceptible to infected populations would be lower. Again, we saw that

350 vectors have an effect almost an order of magnitude higher than the hosts. Thus, we  
351 could expect that these parameters become an interesting target for disease control  
352 initiatives.

353

354 Importantly, our model is implemented using the palm as spatial unit; the choice is  
355 based in its fundamental role in the ecology of both vector and host populations. A  
356 mathematical model with a different spatial resolution (i.e. a village) faces the  
357 challenge of vector and host mobility. In addition, a temporal model often assumes  
358 complete mixing in the spatial component and that is an important aspect to study any  
359 host – vector disease model. Here restricting the model to the palm for the analysis  
360 simplify and constrain the model results. Extrapolating our results to villages with  
361 multiple palms has to be done carefully because hosts often visit multiple palms and  
362 insects could move also between palms and houses. We believe that our results  
363 should apply to higher levels of aggregation such as villages with high and  
364 homogeneous palms density with easy access between palms to guaranteed  
365 population mixing. However, including the palm distribution in the model implies a  
366 different theoretical approach that although is an important hypothesis it is out of the  
367 scope of this paper.

368

369 From a biological perspective, the ability of the model to capture important disease  
370 dynamics is what makes it useful for testing potential control strategies and studying  
371 *T. cruzi* transmission in sylvatic host species different from *D. marsupialis*. For  
372 example, if we increase death rate of vectors and simultaneously decrease the  
373 transmission rates to a point where they cancel out is possible to eradicate the disease.  
374 This is an important result, because control strategies often target one parameter at a  
375 time (i.e. increase vector mortality - house spraying, decrease contact rates - improve  
376 house materials), but it seems more reasonable to intervene all of them at the same  
377 time taking care in shifting the disease balance from endemic to temporal. In fact, it  
378 has been proposed that using a particular control method does not exclude using  
379 another one [10]. One way to achieve this at the household level is to combine  
380 spraying, which increases insect mortality, with presence of non-reservoirs peri-  
381 domestic species, such as chickens, providing another vector feeding. However, there  
382 is potential negative effect because the latter could increase vector carrying capacity.  
383 In addition to the previous analysis the model could be used to further refine the range  
384 of unknown parameters. For example, the transmission rates,  $\beta_{HV}$  and  $\beta_{VH}$ , are difficult  
385 to estimate, however if one has reports of the densities for host and vectors, proportion  
386 of infected host and vectors, and a good estimate of death rates, then it is easy to

387 calculate the transmission rates. This technique could be implemented combining  
388 fieldwork and the mathematical expressions to make the model adequate to a certain  
389 region, and thus a useful disease control tool.

390

### 391 **Conclusions**

392 In Latin America, the transmission dynamics of Chagas disease vary significantly  
393 between regions and the Orinoco epidemiological scenario involves a unique mixture  
394 of factors that requires interdisciplinary approaches. Computational models, along with  
395 biological knowledge, are a great tool to test hypotheses and forecast epidemic events,  
396 becoming great allies in understanding transmission mechanisms and designing  
397 control strategies.

398

### 399 **Acknowledgements**

400 [funding sources should not be included here or in the manuscript file, only during  
401 manuscript submission]

402

### 403 **References**

- 404 1. World Health Organization 2015. Chagas disease in Latin America: an  
405 epidemiological update based on 2010 estimates. *Weekly epidemiological  
406 record Relevé épidémiologique hebdomadaire No. 6, 90*: 33-40.
- 407 2. Catala S, Crocco LB, Morales GF 1997. *Trypanosoma cruzi* transmission risk  
408 index (TcTRI): an entomological indicator of Chagas disease vectorial  
409 transmission to humans. *Acta Trop* 68: 285-295.
- 410 3. Rassi AJ RA, Marin-Neto JÁ 2010. Chagas disease. Seminar. *Lancet* 375:  
411 1338-1402.
- 412 4. Coura JR, Junqueira AC, Fernandes O, Valente SA, Miles MA 2002.  
413 Emerging Chagas disease in Amazonian Brazil. *Trends Parasitol* 18: 171-  
414 176.
- 415 5. Sanchez LV, Ramírez JD 2012. Congenital and oral transmission of American  
416 trypanosomiasis: an overview of physiopathogenic aspects. *Parasitology* 139:  
417 1-13.
- 418 6. Thomas ME, Rasweiler IV JJ, D'Alessandro A 2007. Experimental  
419 transmission of the parasitic flagellates *Trypanosoma cruzi* and *Trypanosoma*



- 420           *rangeli* between triatomine bugs or mice and captive neotropical bats. *Mem*  
421           *Inst Oswaldo Cruz* 102: 559-565.
- 422         7. Herrera HM, Rocha FL, Lisboa CV, Rademaker V, Mourao GM, Jansen AM  
423           2011. Food web connections and the transmission cycles of *Trypanosoma*  
424           *cruzi* and *Trypanosoma evansi* (Kinetoplastida, Trypanosomatidae) in the  
425           Pantanal Region, Brazil.                                 : 380-387.
- 426         8. Jansen A, Santos de Pinho A, Varella LC, Cupolillo E, Mangia RH, Fernandes  
427           O 1999. The Sylvatic Cycle of *Trypanosoma cruzi*: a Still Unsolved Puzzle.  
428           *Mem Inst Oswaldo Cruz* 94: 203-204.
- 429         9. Jansen A, Carreira J, Deane M 1988. Infection of a mammal by monogenetic  
430           insect Trypanosomatids (Kinetoplastida, Trypanosomatidae). *Mem Inst*  
431           *Oswaldo Cruz* 81: 271-272.
- 432         10. Guhl F 2009. Enfermedad de Chagas: Realidad y perspectivas. *Biomedica*  
433           20: 228-234.
- 434         11. Cohen JE, Gurtler RE 2001. Modeling household transmission of American  
435           trypanosomiasis. *Science* 293: 694-698.
- 436         12. Fitzpatrick S, Feliciangeli MD, Sanchez-Martin MJ, Monteiro FA, Miles MA  
437           2008. Molecular genetics reveal that silvatic *Rhodnius prolixus* do colonise  
438           rural houses. *PLoS Negl Trop Dis* 2: e210.
- 439         13. Sanchez-Martin MJ, Feliciangeli MD, Campbell-Lendrum D, Davies CR 2006.  
440           Could the Chagas disease elimination programme in Venezuela be  
441           compromised by reinvasion of houses by sylvatic *Rhodnius prolixus* bug  
442           populations? *Trop Med Int Health* 11: 1585-1593.
- 443         14. Minoli SA, Lazzari CR 2006. Take-off activity and orientation of triatomines  
444           (Heteroptera: Reduviidae) in relation to the presence of artificial lights. *Acta*  
445           *Trop* 97: 324-330.
- 446         15. Jansen AM, Xavier SCC, Roque ALR 2015. The multiple and complex and  
447           changeable scenarios of the *Trypanosoma cruzi* transmission cycle in the  
448           sylvatic environment. *Acta Trop* 151: 1-15.
- 449         16. Miles MA, Feliciangeli MD, de Arias AR 2003. Science, medicine, and the  
450           future - American trypanosomiasis (Chagas' disease) and the role of  
451           molecular epidemiology in guiding control strategies. *Brit Med J* 326: 1444-  
452           1448.
- 453         17. Feliciangeli MD, Dujardin JP, Bastrenta B, Mazzarri M, Villegas J, Flores M,  
454           Muñoz M 2002. Is *Rhodnius robustus* (Hemiptera: Reduviidae) responsible  
455           for Chagas disease transmission in Western Cenezuela? *Trop Med Int Health*  
456           7: 280-287.

- 457 18. Dias JCP 2007. Southern Cone Initiative for the elimination of domestic  
458 populations of *Triatoma infestans* and the interruption of transfusional Chagas  
459 disease. Historical aspects, present situation, and perspectives. *Mem Inst*  
460 *Oswaldo Cruz* 102: 11-18.
- 461 19. Dias JCP, Silveira AC, Schofield CJ 2002. The impact of Chagas disease  
462 control in Latin America - A review. *Mem Inst Oswaldo Cruz* 97: 603-612.
- 463 20. Campbell-Lendrum DH, Angulo VM, Esteban L, Tarazona Z, Parra GJ  
464 Restrepo M, Restrepo BN, Guhl F, Pinto N, Aguilera G, Wilkinson P, Davies  
465 CR 2007. House-level risk factors for triatomine infestation in Colombia. *Int J*  
466 *Epidemiol* 36: 866-872.
- 467 21. WHO/TDR UW 1999. Chile and Brazil to be certified free of transmission of  
468 Chagas disease. TDR News.
- 469 22. Guhl F 1998. Estado actual del control de la enfermedad de Chagas en  
470 Colombia. In: Guhl F JCE, editor. Curso-taller control de tripanosomiasis  
471 americana y leishmaniasis: aspectos biológicos, genéticos y moleculares.  
472 Bogotá: Corcas Editores. pp. 47-81.
- 473 23. Guhl F, Pinto N, Aguilera G 2009. Sylvatic triatominae: a new challenge in  
474 vector control transmission. *Mem Inst Oswaldo Cruz* 104: 71-75.
- 475 24. Guhl F, Aguilera G, Pinto N, Vergara D 2007. Actualización de la distribución  
476 geográfica y ecoepidemiología de la fauna de triatominos (Reduviidae:  
477 Triatominae) en Colombia. *Biomédica* 27(Supl. 1): 143-62.
- 478 25. Angulo V, Esteban L, Luna KP 2012. *Attalea butyracea* próximas a las  
479 viviendas como posible fuente de infestación domiciliaria por *Rhodnius prolixus*  
480 (Hemiptera: Reduviidae) en los Llanos Orientales de Colombia. *Biomédica*  
481 32(2).
- 482 26. Rendón LM, Guhl F, Cordovez JM, Erazo D 2015. New scenarios of  
483 *Trypanosoma cruzi* transmission in the Orinoco region of Colombia. *Mem Inst*  
484 *Oswaldo Cruz* 110(3): 283-288.
- 485 27. Urbano P, Poveda C, Molina J 2015. Effect of the physiognomy of *Attalea*  
486 *butyracea* (Arecoideae) on population density and age distribution of *Rhodnius*  
487 *prolixus* (Triatominae). *Parasit Vectors* 8: 199.
- 488 28. Benchimol Barbosa PR 2006. The oral transmission of Chagas' disease: an  
489 acute form of infection responsible for regional outbreaks. *Int J Cardiol* 112:  
490 132-133.
- 491 29. Brutus L, Schneider D, Postigo J, Romero M, Santalla J, Chippaux JP 2008.  
492 Congenital Chagas disease: diagnostic and clinical aspects in an area without  
493 vectorial transmission, Bermejo, Bolivia. *Acta Trop* 106: 195-199.

- 494 30. Ramirez et al. 2014
- 495 31. Fernandes O, Mangia RH, Lisboa CV, Pinho AP, Morel CM, Zingales B,  
496 Campbell DA, Jansen AM 1999. The complexity of the sylvatic cycle of  
497 *Trypanosoma cruzi* in Rio de Janeiro state (Brazil) revealed by the non-  
498 transcribed spacer of the mini-exon gene. *Parasitology* 118 (Pt 2): 161-166.
- 499 32. Grisard EC, Carvalho-Pinto CJ, Scholz AF, Toma HK, Schlemper BR Jr,  
500 Steindel M 2000. *Trypanosoma cruzi* infection in *Didelphis marsupialis* in  
501 Santa Catarina and Arvoredo Islands, southern Brazil. *Mem Inst Oswaldo*  
502 *Cruz* 95: 795-800.
- 503 33. Sanchez JL CJ, Vallejo GA, Lozano LE, Jaramillo JC, Guhl F 2000.  
504 Diagnóstico molecular de *Trypanosoma cruzi* en reservorios y humanos en  
505 un área endémica del departamento del Tolima. Curso-Taller Internacional:  
506 "Biología, Epidemiología y Control de la Tripanosomiasis Americana y  
507 Leshmaniasis": Mayo 29 Junio 23, pp. 63-68.
- 508 34. Pinto N MD, Herrera C, Vallejo G, Naranjo JM, Guhl F 2005. Comprobación  
509 del ciclo selvatico de *Rhodnius prolixus* en reductos de *Attalea Butyracea* en  
510 el departamento de Casanare. *Biomédica* 25: 159.
- 511 35. Velasco-Hernandez JX 1991. An epidemiological model for the dynamics of  
512 Chagas' disease. *Biosystems* 26: 127-134.
- 513 36. Das P, Mukherjee D 2006. Qualitative study of a model of Chagas' disease.  
514 *Math Comput Model* 43: 413-422.
- 515 37. Raimundo SM, Massad E, Yang HM 2010. Modelling congenital transmission  
516 of Chagas' disease. *Biosystems* 99: 215-222.
- 517 38. Slimi R, El Yacoubi S, Dumonteil E, Gourbiere S 2009. A cellular automata  
518 model for Chagas disease. *Appl Math Model* 33: 1072-1085.
- 519 39. Inaba H, Sekine H 2004. A mathematical model for Chagas disease with  
520 infection-age-dependent infectivity. *Math Biosci* 190: 39-69.
- 521 40. Castañera MB, Aparicio JP, Gurtler RE 2003. A stage-structured stochastic  
522 model of the population dynamics of *Triatoma infestans*, the main vector of  
523 Chagas disease. *Ecol Model* 162: 33-53.
- 524 41. Fabrizio et al. 2016
- 525 42. Petersen et al. 2015
- 526 43. Erazo, D., & Cordovez, J. (2016). Modeling the effects of palm-house proximity  
527 on the theoretical risk of Chagas disease transmission in a rural locality of the  
528 Orinoco basin, Colombia. *Parasites & Vectors*, 9(1), 592.  
529 <https://doi.org/10.1186/s13071-016-1884-8>

- 530 44. Cordovez JM and Sanabria C 2014. Environmental Changes Can Produce  
531 Shifts in Chagas Disease Infection Risk. *Environmental Health Insights* 8(S2):  
532 43-48 doi: 10.4137/EHI.S16002.
- 533 45. Rabinovich J, Solarz ND, Gürtler R, Wisnivesky-Colli C 1990. Probability of  
534 transmission of Chagas disease by *Triatoma infestans* (Hemiptera:  
535 Reduviidae) in an endemic area of Santiago del Estero, Argentina. *Bull World*  
536 *Heal Organ* 68: 737-746.
- 537 46. Chaves LF, Hernandez MJ, Revilla TA, Rodriguez DJ, Rabinovich JE 2004.  
538 Mortality profiles of *Rhodnius prolixus* (Heteroptera: reduviidae), vector of  
539 Chagas disease. *Acta Trop* 92(2): 119-125.
- 540 47. Schweigmann NJ, Pietrokovsky S, Bottazzi V, Conti O, Bujas MA,  
541 Wisnivesky-Colli C 1999. Prevalence of *Trypanosoma cruzi* infection in  
542 opossum (*Didelphis albiventris*) in Santiago del Estero, Argentina. *Rev*  
543 *Panam Salud Publica* 6: 371-377.
- 544 48. Reyes AA 2009. Fauna mammalia asociada a los focos de leishmaniasis  
545 neotropical. Situación en Venezuela. *Boletín de Malariología y Salud*  
546 *Ambiental* 1: 35-52.
- 547 49. Telford S, Tonn R 1982. Dinámica de *Trypanosoma cruzi* en poblaciones de  
548 un reservorio primario, *Didelphis marsupialis* en los llanos altos de  
549 Venezuela. *Bol Oficina Sanit Panam* 93: 341-364.
- 550 50. Freire-de-Lima L, da Fonseca LM, da Silva VA, da Costa KM, Morrot A,  
551 Freire-de-Lima CG, Previato JO, Mendonça-Previato L. Modulation of Cell  
552 Sialoglycophenotype: A Stylish Mechanism Adopted by *Trypanosoma cruzi* to  
553 Ensure Its Persistence in the Infected Host. *Front Microbiol.* 2016 May  
554 11;7:698. doi: 10.3389/fmicb.2016.00698. PMID: 27242722; PMCID:  
555 PMC4862976.
- 556 51. Pinho A., Cupolillo E., Mangia R., Fernandes O. & Jansen A. M.  
557 (2000). *Trypanosoma cruzi* in the sylvatic environment: distinct transmission  
558 cycles involving two sympatric marsupials. *Trans. R. Soc. Trop. Med.*  
559 *Hyg.* 94: 509-514.
- 560 52. Deane M., Lenzi H. & Jansen A. (1986). Double development cycle  
561 of *Trypanosoma cruzi* in the opossum. *Parasitol. Today.* 2: 146-147.
- 562 53. Conti O, Schweigmann NJ, Pietrokovsky S, Bottazzi V, Wisnivesky-Colli C.  
563 Search for *Trypanosoma cruzi* in the anal glands of wild *Didelphis*  
564 *albiventris* from Santiago del Estero, Argentina. *Mem Inst Oswaldo Cruz*  
565 1995; 90(6):687

- 566 54. Jansen AM, Madeira FB, Deane MP. *Trypanosoma cruzi* infection in the  
567 opossum *Didelphis marsupialis*: absence of neonatal transmission and  
568 protection by maternal antibodies in experimental infections. Mem Inst  
569 Oswaldo Cruz 1994;89:4145.  
570  
571  
572  
573

574 **Figure legends**

575 **Figure 1.** A) Shows the Vector-host model. Vector-host model with transmission  
576 between hosts

577

578 **Figure 2.** Latin Hypercube Sampling for the global reproductive number  $R_0$ . PRCC:  
579 Partial Rank Correlation Coefficient. Black colored circles correspond to the model  
580 without oral transmission and gray to the model including oral transmission. For  
581 information about each parameter's explanation see Table 1. Note that parameters  
582 related to host-vector (and vice versa) infection rates and populations ( $N_v$ ,  $N_H$ ,  $\beta_{HV}$ ,  
583  $\beta_{VH,0}$ , and  $\beta_{VH,1}$ ) have a positive contribution to  $R_0$ . On the contrary, vector and host  
584 death rates ( $\mu_v$  and  $\mu_H$ ) have a negative effect in  $R_0$ .

585

586 **Figure 3.**  $R_0$  values depicted in z depending on  $\beta_{HV}$  (here in x) and  $\beta_{VH,0}$  (here in y)  
587 we used for the analyses the palm as the study unit. In this case the max  $R_0$  is lower  
588 than 0.4.

589

590 **Figure 4.** The x axis represents n  $\beta_{VH,1}$  values range and their corresponding  $R_0$ . We  
591 assume maximum values for  $\beta_{HV}$  (1) and  $\beta_{VH,0}$  (0.01). In this case,  $\beta_{VH,1}$  must be larger  
592 than 0.07, for  $R_0$  to have a value above 1.

593

594

595 **Tables**

596 **Table I.** Parameters used in the mathematical model of the sylvatic cycle of Chagas  
597 disease.

598
